# Supplementary material for: TiO2 Microparticles Incorporation in Coatings Produced by Plasma Electrolytic Oxidation (PEO) on Titanium
Source: MDPI journal article supplement (doi:10.3390/coatings13101718), 2023-09-30
Supplement: s1 [file s1]

# TiO<sub>2</sub> Microparticles Incorporation in Coatings Produced by Plasma Electrolytic Oxidation (PEO) on Titanium

Federica Ceriani, Luca Casanova, Luca Massimini, Andrea Brenna and Marco Ormellese \*

Department of Chemistry, Materials and Chemical Engineering “G. Natta”, Politecnico di Milano, Via Mancinelli 7, 20131 Milano, Italy; federica.ceriani@polimi.it (F.C.); luca.casanova@polimi.it (L.C.); andrea.brenna@polimi.it (A.B.)

\* Correspondence: marco.ormellese@polimi.it; Tel.: +39-02-2399-3118

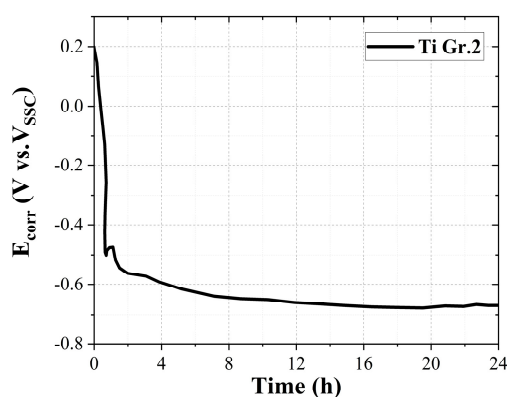

Figure S1.  $E_{\text{corr}}$  data of titanium grade 2 for 24 h test performed in in H<sub>2</sub>SO<sub>4</sub> 10 %v/v at 60 °C.

**Citation:** Ceriani, F.; Casanova, L.; Massimini, L.; Brenna, A.; Ormellese, M. TiO<sub>2</sub> Microparticles Incorporation in Coatings Produced by Plasma Electrolytic Oxidation (PEO) on Titanium. *Coatings* **2023**, *13*, 1718. <https://doi.org/10.3390/coatings13101718>

Academic Editor: Philipp Vladimirovich Koryukhantsev-Korneev

Received: 24 August 2023

Revised: 28 September 2023

Accepted: 28 September 2023

Published: 30 September 2023

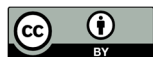

**Copyright:** © 2023 by the authors. Submitted for possible open access publication under the terms and conditions of the Creative Commons Attribution (CC BY) license (<https://creativecommons.org/licenses/by/4.0/>).

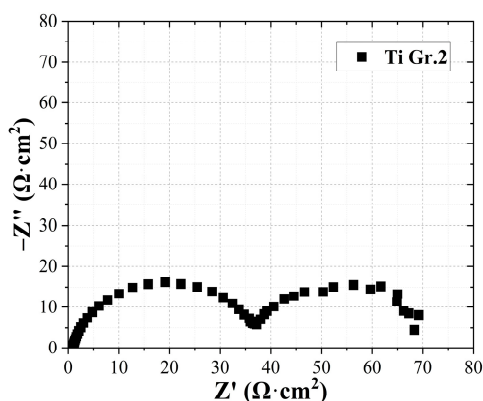

Figure S2. Nyquist diagram of titanium grade 2 in in H<sub>2</sub>SO<sub>4</sub> 10 %v/v at 60 °C.

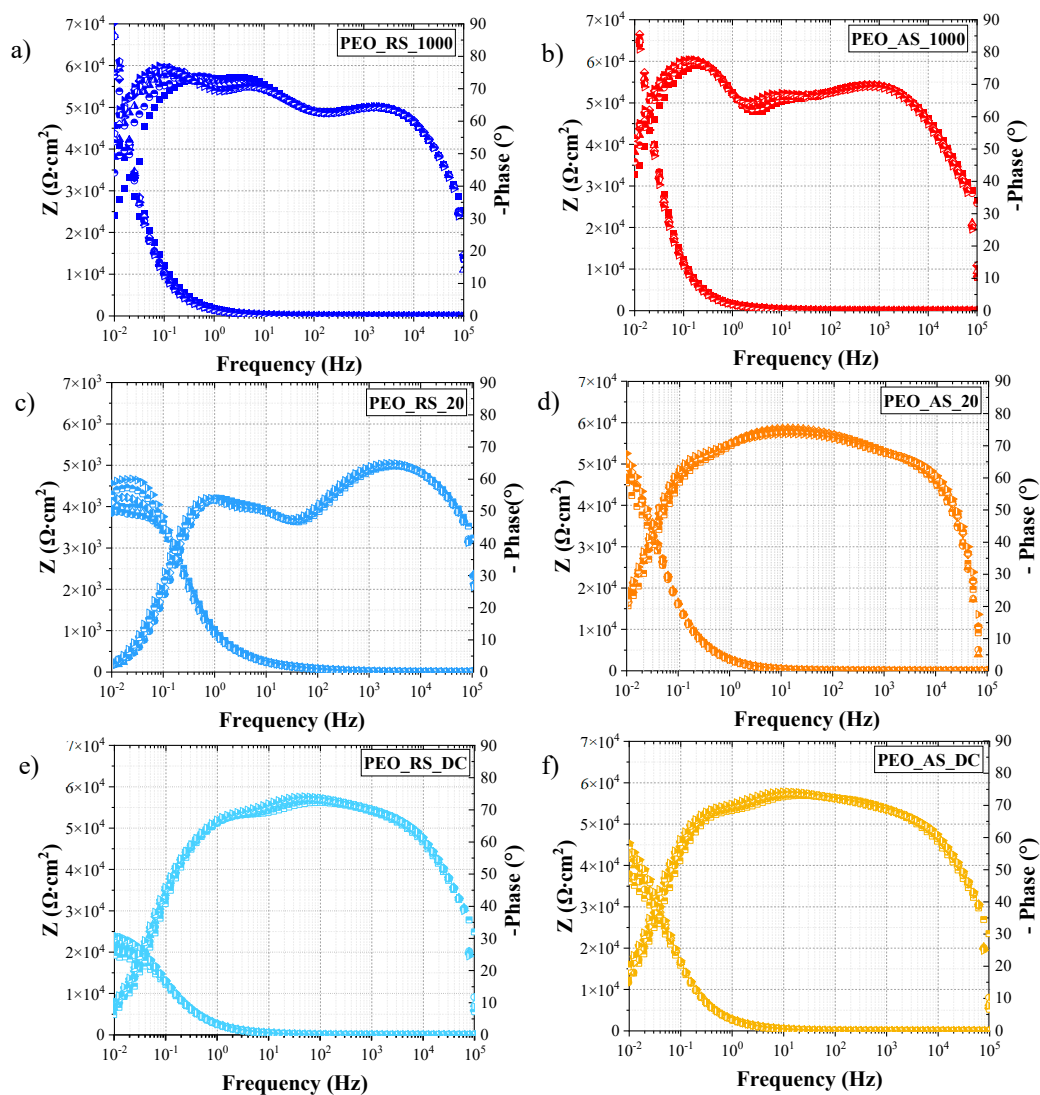

**Figure S3.** Bode and phase diagrams of a) PEO\_RS\_1000, b) PEO\_AS\_1000, c) PEO\_RS\_20 (different scale), d) PEO\_AS\_20, e) PEO\_RS\_DC, f) PEO\_AS\_DC in  $\text{H}_2\text{SO}_4$  10 %v/v at 60 °C.

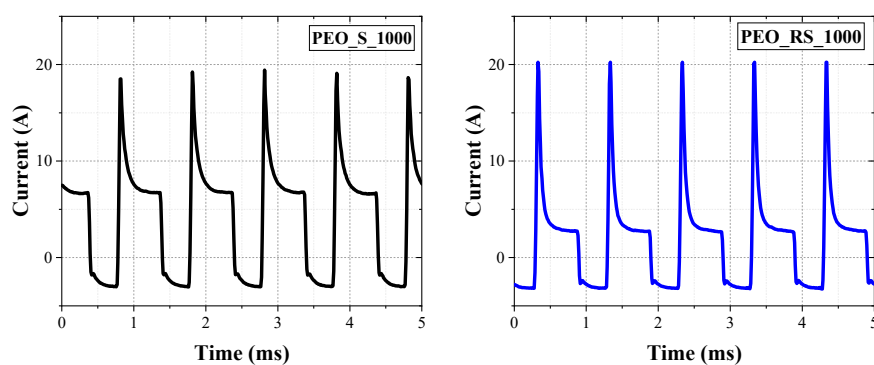

**Figure S4.** Current (I)-time curves at the ms time scale of a) PEO\_S\_1000 and PEO\_RS\_1000.
